# Supplementary material for: Water soluble biguanide salts and their 1,3,5-triazine derivatives as inhibitors of acetylcholinesterase and α-glucosidase
Source: publisher site journal article supplement (doi:10.1515/zkri-2020-0025), 2020-08-31
Supplement: Supplementary file 1 [file j_zkri-2020-0025_suppl_001.docx]

**Water soluble biguanide salts and their 1,3,5-triazine derivatives as inhibitors of acetylcholinesterase and a-glucosidase**

Ozge Gungora, Seda Nur Kertmen Kurtarb, Muhammet Kosea

*aChemistry Department, Kahramanmaras Sutcu Imam University, Kahramanmaras, 46050, Turkey*

*bMaterial Science and Engineering Department, Kahramanmaras Sutcu Imam University, Kahramanmaras, 46050, Turkey*

**Corresponding authors*:** Dr. Muhammet KOSE

**Email:** [muhammetkose@ksu.edu.tr](mailto:muhammetkose@ksu.edu.tr)

**Table of contents**

[**Fig. S1** 1H-NMR spectrum of [HL1]Cl. 3](#_Toc43459585)

[**Fig. S2** 13C-NMR spectrum of [HL1]Cl. 4](#_Toc43459586)

[**Fig. S3** 1H-NMR spectrum of [HL2]Cl. 5](#_Toc43459587)

[**Fig. S4** 13C-NMR spectrum of [HL2]Cl. 6](#_Toc43459588)

[**Fig. S5** 1H-NMR spectrum of [HL3]Cl. 7](#_Toc43459589)

[**Fig. S6** 1H-NMR spectrum of [HL4]Cl. 8](#_Toc43459590)

[**Fig. S7** 13C-NMR spectrum of [HL4]Cl. 9](#_Toc43459591)

[**Fig. S8** 1H-NMR spectrum of [HL5]Cl. 10](#_Toc43459592)

[**Fig. S9** 13C-NMR spectrum of [HL5]Cl. 11](#_Toc43459593)

[**Fig. S10** 1H-NMR spectrum of [H2L6]Cl2. 12](#_Toc43459594)

[**Fig. S11** 13C-NMR spectrum of [H2L6]Cl2. 13](#_Toc43459595)

[**Fig. S12** 1H-NMR spectrum of [H2L7]Cl2. 14](#_Toc43459596)

[**Fig. S13** 1H-NMR spectrum of [HL1a]Cl. 15](#_Toc43459597)

[**Fig. S14** 13C-NMR spectrum of [HL1a]Cl. 16](#_Toc43459598)

[**Fig. S15** 1H-NMR spectrum of [HL2a]Cl. 17](#_Toc43459599)

[**Fig. S16** 13C-NMR spectrum of [HL2a]Cl. 18](#_Toc43459600)

[**Fig. S17** 1H-NMR spectrum of [HL3a]Cl. 19](#_Toc43459601)

[**Fig. S18** 1H-NMR spectrum of [HL4a]Cl. 20](#_Toc43459602)

[**Fig. S19** 13C-NMR spectrum of [HL4a]Cl. 21](#_Toc43459603)

[**Fig. S20** 1H-NMR spectrum of [HL5a]Cl. 22](#_Toc43459604)

[**Fig. S21** 13C-NMR spectrum of [HL5a]Cl. 23](#_Toc43459605)

[**Fig. S22** FT-IR spectrum of [HL1]Cl. 24](#_Toc43459606)

[**Fig. S23** FT-IR spectrum of [HL2]Cl. 25](#_Toc43459607)

[**Fig. S24** FT-IR spectrum of [HL3]Cl. 26](#_Toc43459608)

[**Fig. S25** FT-IR spectrum of [HL4]Cl. 27](#_Toc43459609)

[**Fig. S26** FT-IR spectrum of [HL5]Cl. 28](#_Toc43459610)

[**Fig. S27** FT-IR spectrum of [H2L6]Cl2. 29](#_Toc43459611)

[**Fig. S28** FT-IR spectrum of [H2L7]Cl2. 30](#_Toc43459612)

[**Fig. S29** FT-IR spectrum of [HL1a]Cl. 31](#_Toc43459613)

[**Fig. S30** FT-IR spectrum of [HL2a]Cl 32](#_Toc43459614)

[**Fig. S31** FT-IR spectrum of [HL3a]Cl. 33](#_Toc43459615)

[**Fig. S32** FT-IR spectrum of [HL4a]Cl. 34](#_Toc43459616)

[**Fig. S33** FT-IR spectrum of [HL5a]Cl 35](#_Toc43459617)

[**Fig. S34** π-electron delocalization in biguanidine derivatives and their 1,3,5-triazine derivatives. 36](#_Toc43459618)

[**Fig. S35** The NH∙∙∙∙Cl hydrogen bond network in [H2L7]Cl2. 37](#_Toc43459619)

[**Fig. S36** Packing diagram of [H2L7]Cl2. 38](#_Toc43459620)

[**Fig. S37** Packing diagram of [HL1a]Cl showing the NH∙∙∙∙Cl hydrogen bond network. 39](#_Toc43459621)

**Fig. S1** 1H-NMR spectrum of [HL1]Cl.

**Fig. S2** 13C-NMR spectrum of [HL1]Cl.

**Fig. S3** 1H-NMR spectrum of [HL2]Cl.

**Fig. S4** 13C-NMR spectrum of [HL2]Cl.


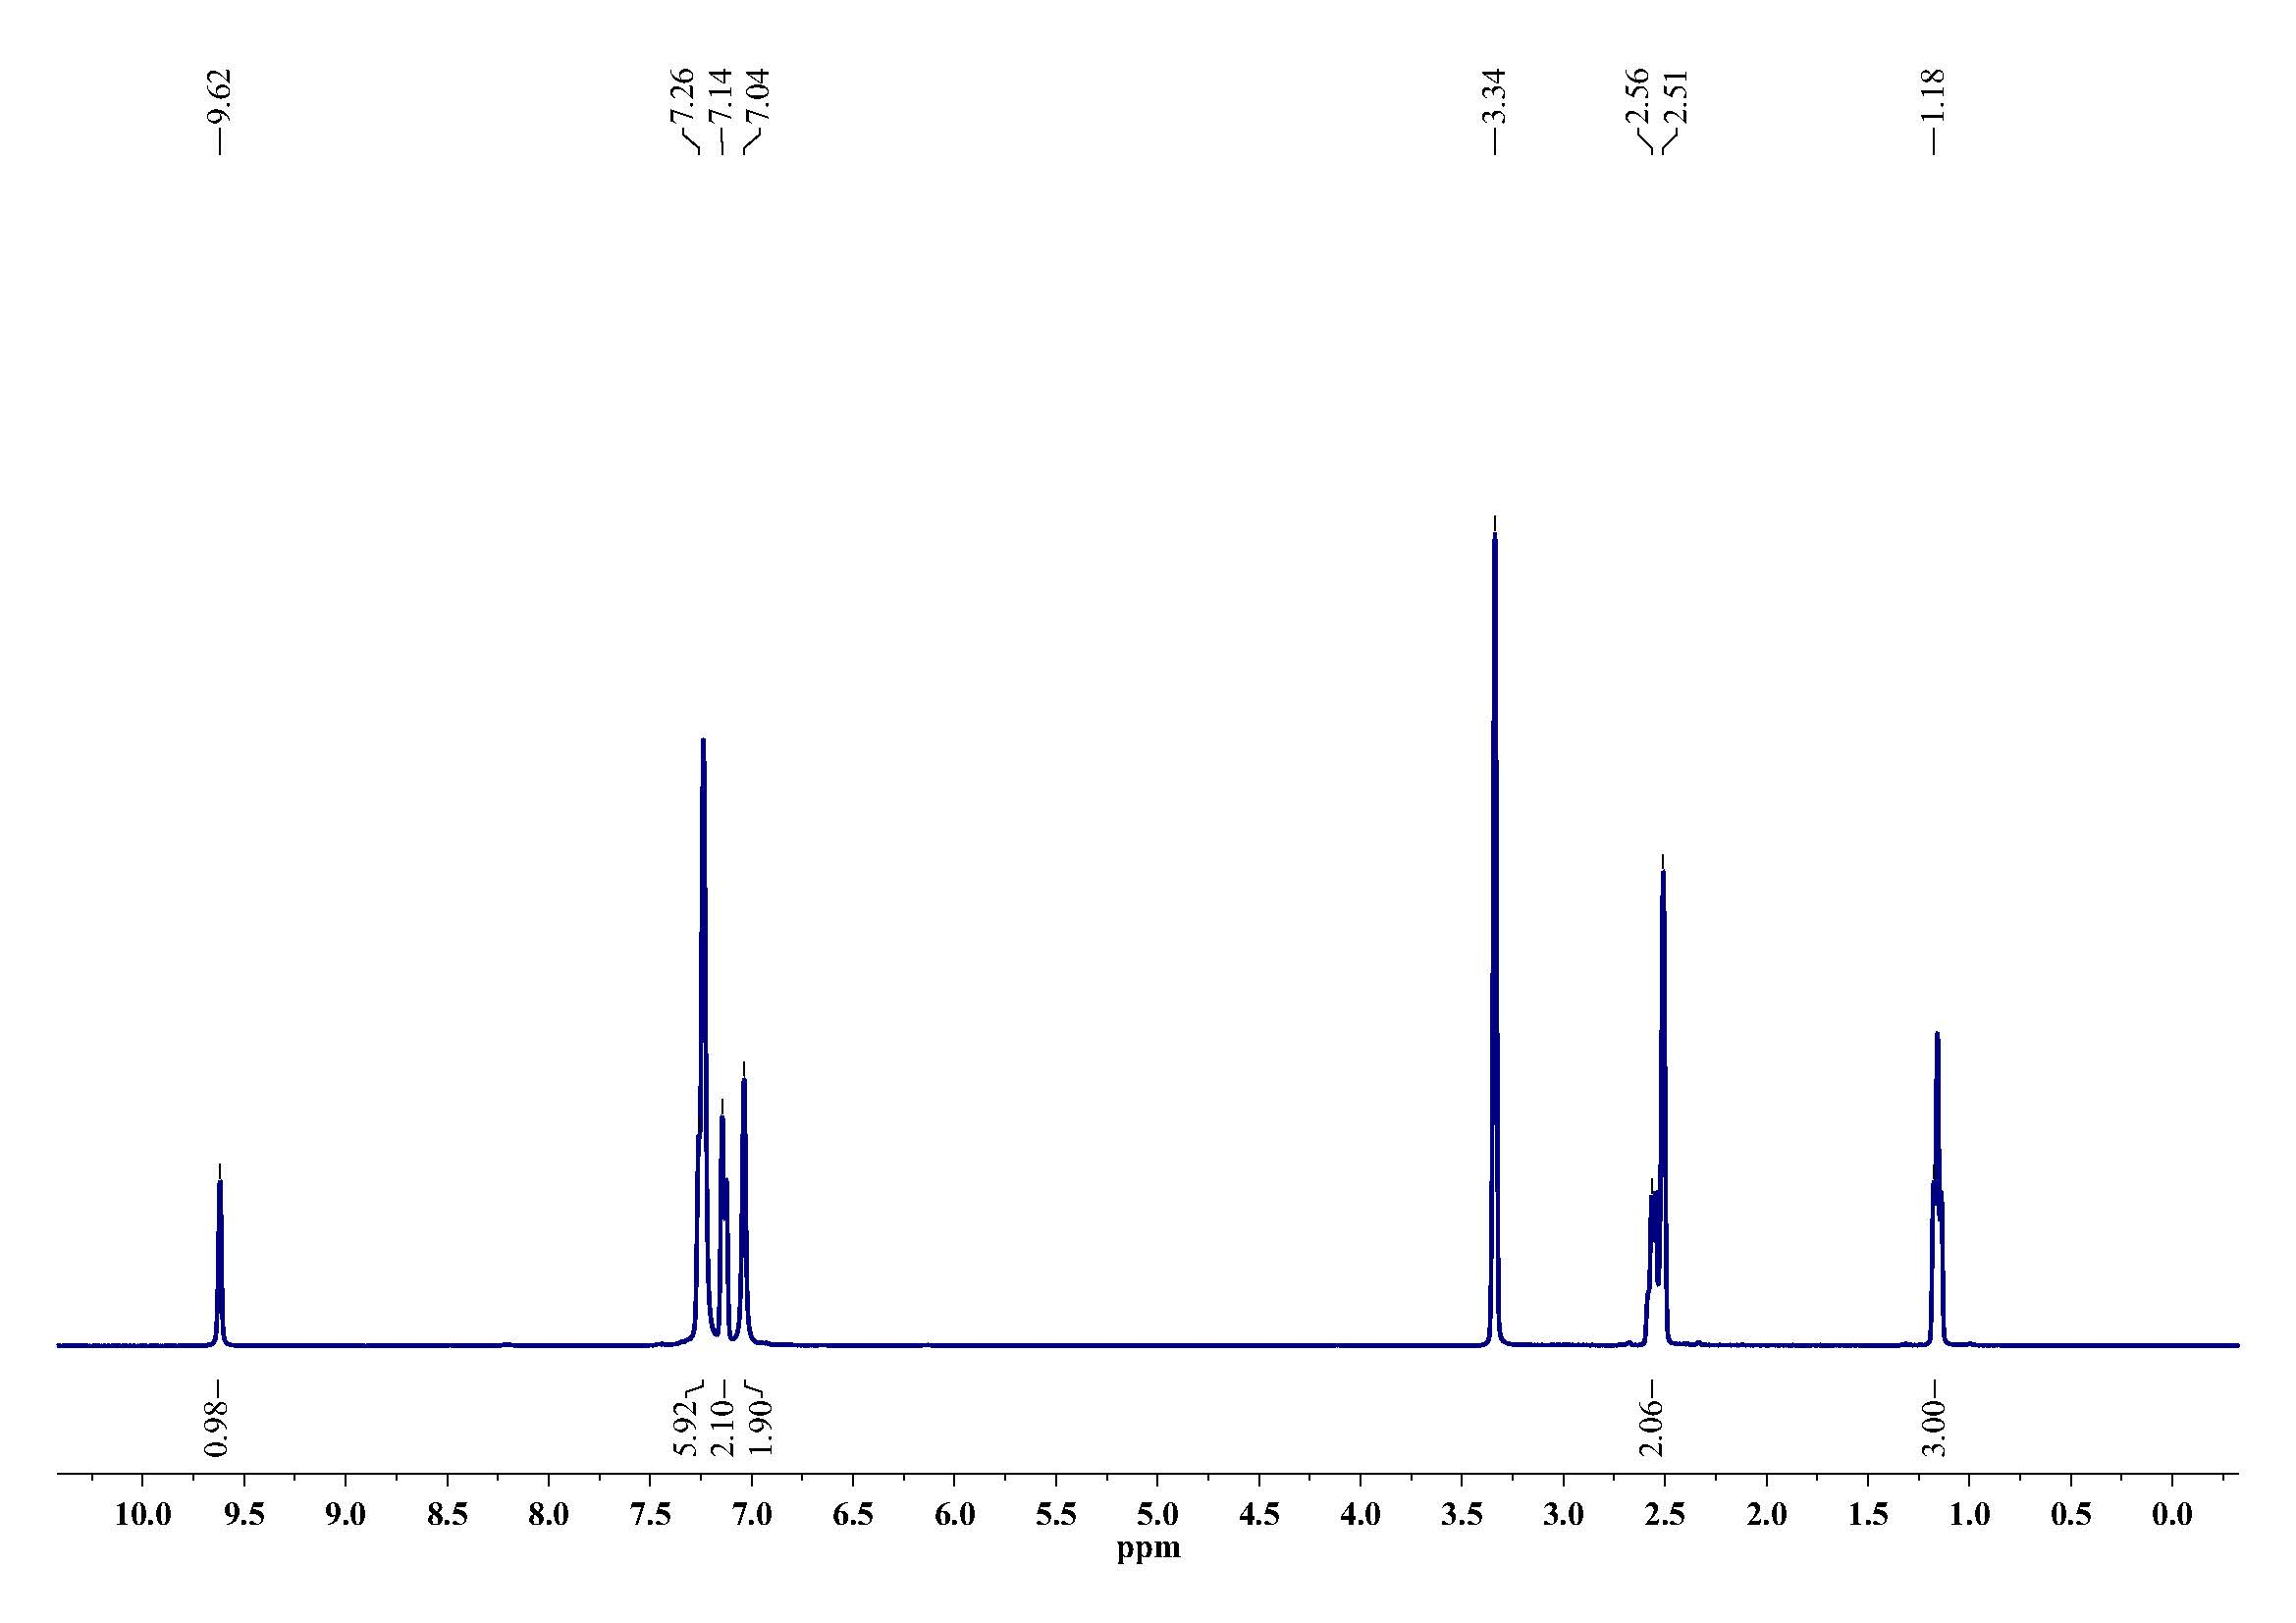


**Fig. S5** 1H-NMR spectrum of [HL3]Cl.

**Fig. S6** 1H-NMR spectrum of [HL4]Cl.

**Fig. S7** 13C-NMR spectrum of [HL4]Cl.

**Fig. S8** 1H-NMR spectrum of [HL5]Cl.


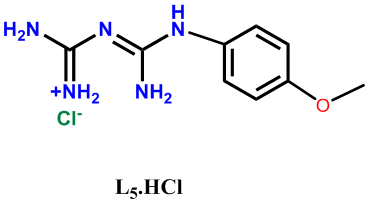


**Fig. S9** 13C-NMR spectrum of [HL5]Cl.

**Fig. S10** 1H-NMR spectrum of [H2L6]Cl2.

**Fig. S11** 13C-NMR spectrum of [H2L6]Cl2.

**Fig. S12** 1H-NMR spectrum of [H2L7]Cl2.

**Fig. S13** 1H-NMR spectrum of [HL1a]Cl.

**Fig. S14** 13C-NMR spectrum of [HL1a]Cl.

**Fig. S15** 1H-NMR spectrum of [HL2a]Cl.

**Fig. S16** 13C-NMR spectrum of [HL2a]Cl.


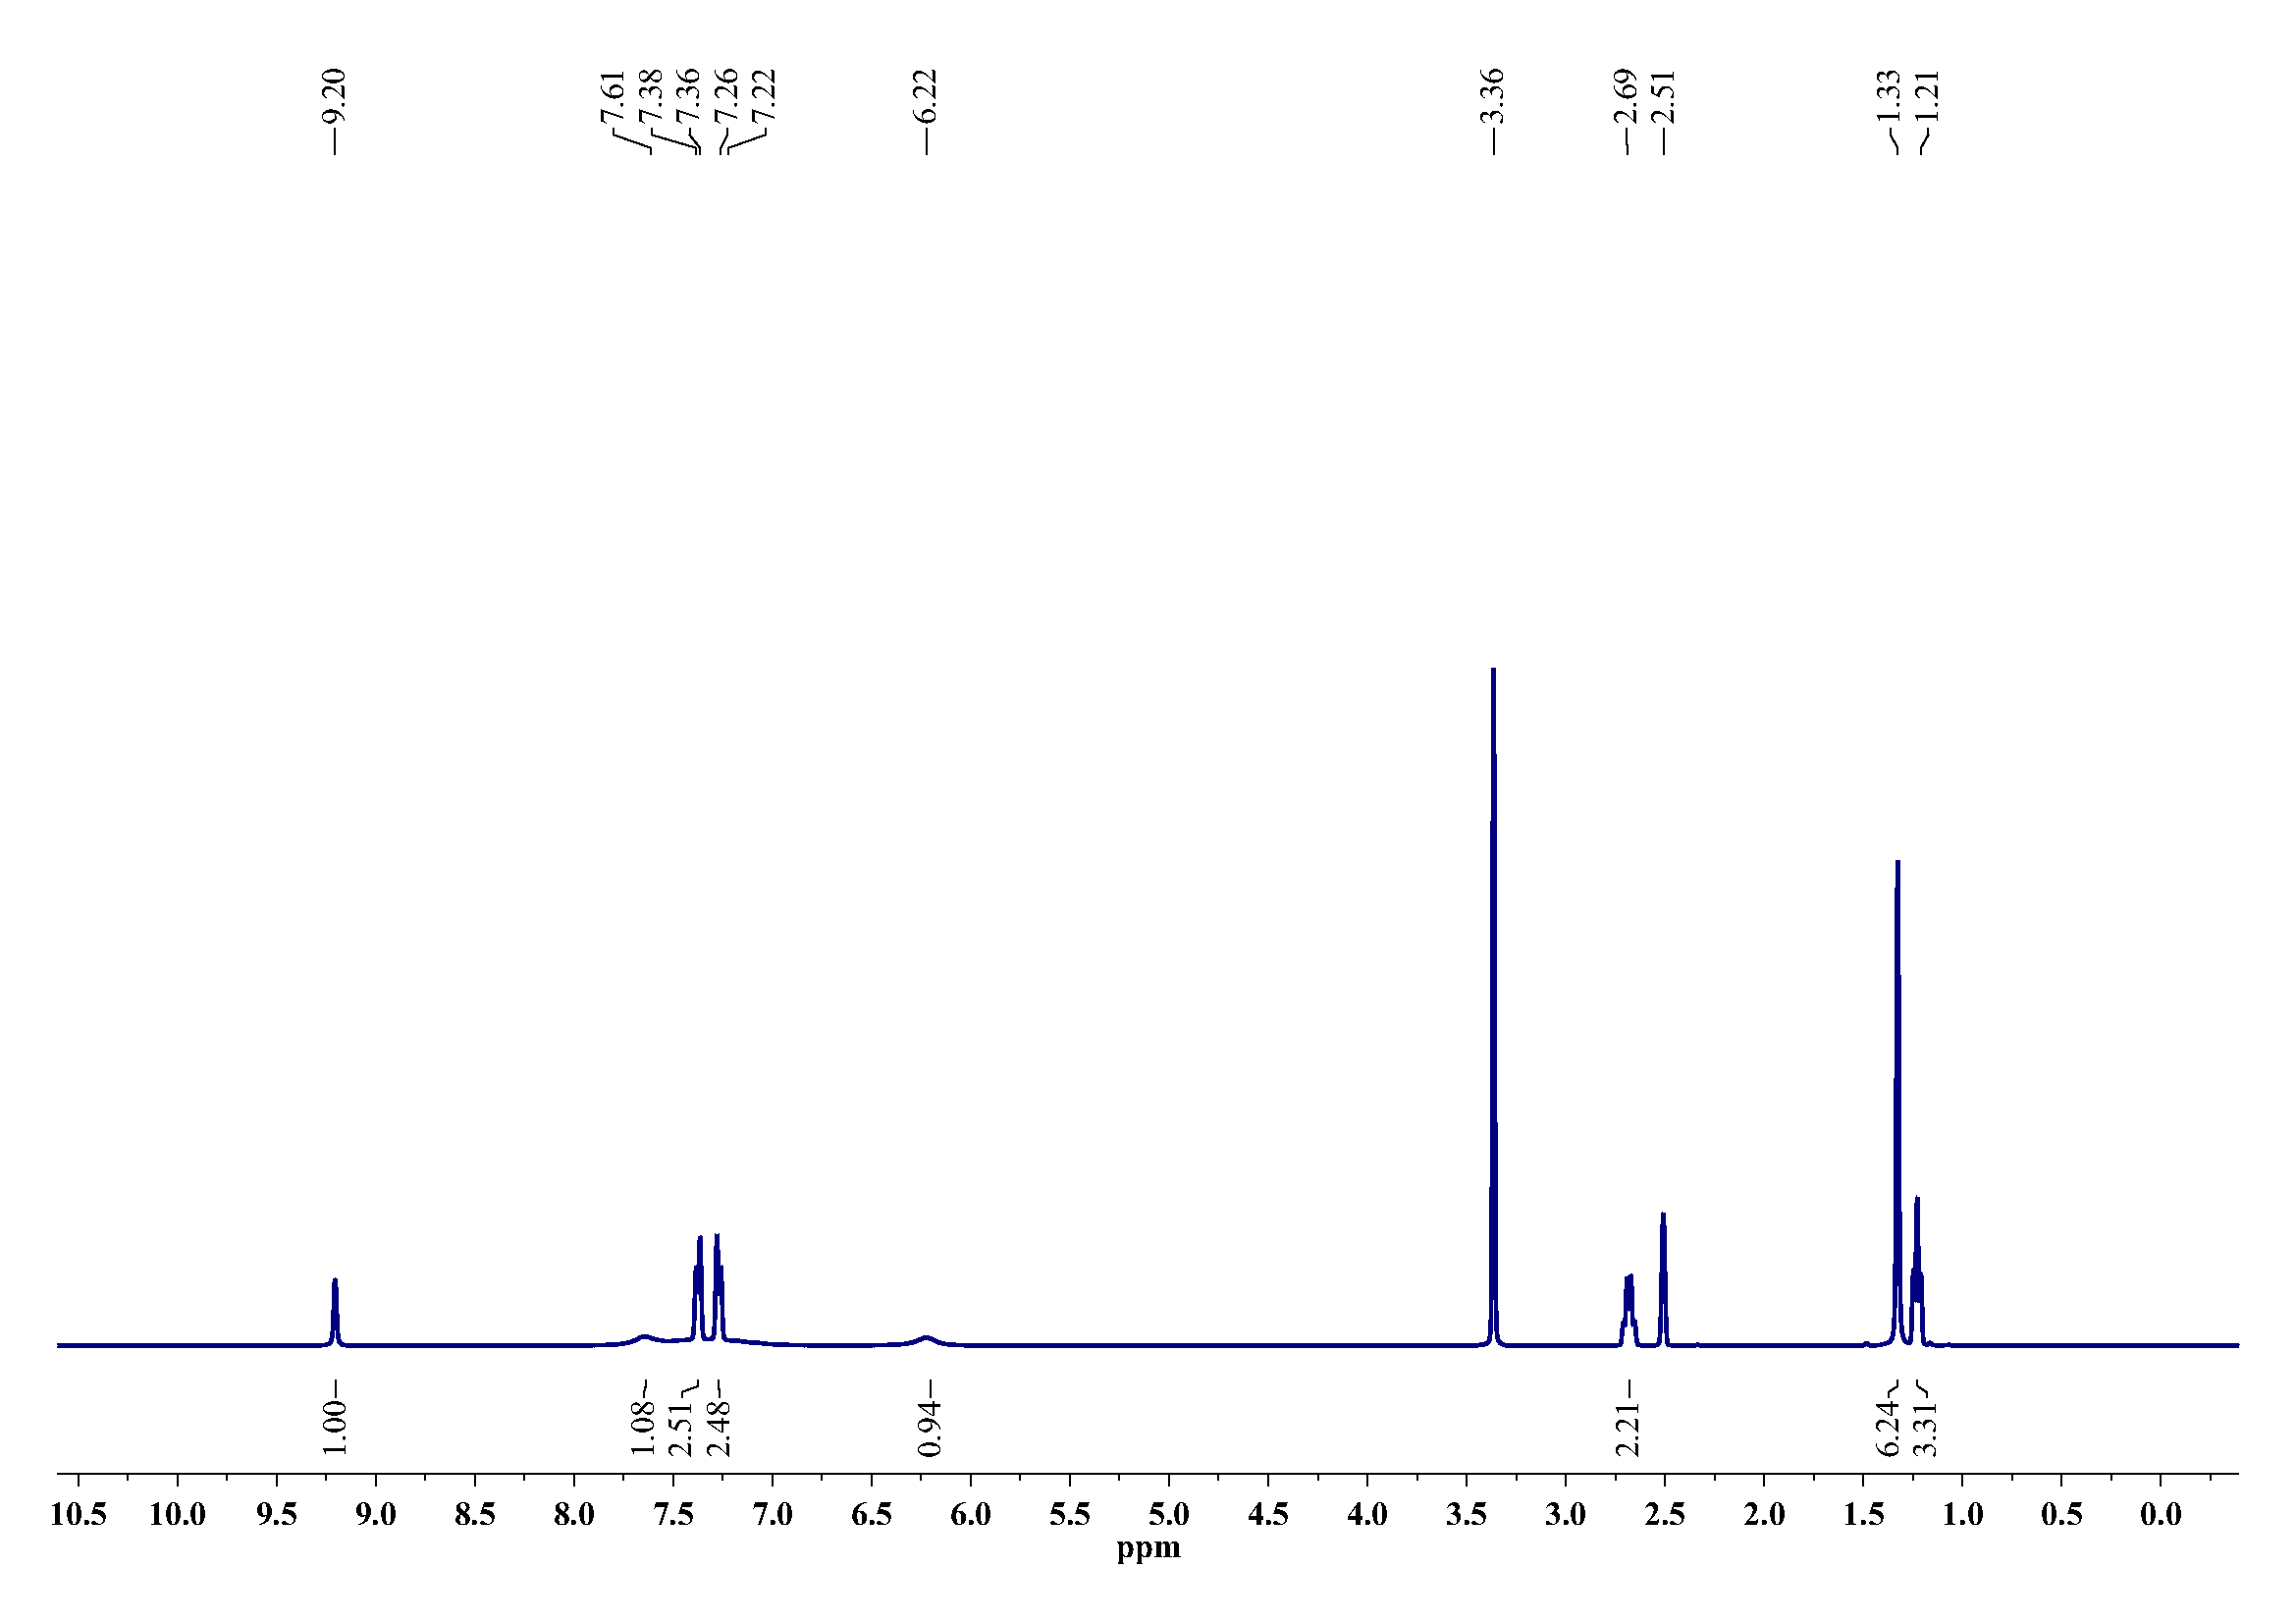


**Fig. S17** 1H-NMR spectrum of [HL3a]Cl.

**Fig. S18** 1H-NMR spectrum of [HL4a]Cl.

**Fig. S19** 13C-NMR spectrum of [HL4a]Cl.

**Fig. S20** 1H-NMR spectrum of [HL5a]Cl.


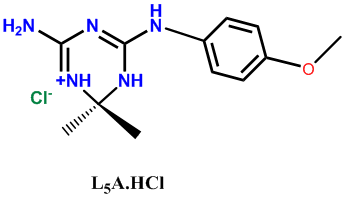


**Fig. S21** 13C-NMR spectrum of [HL5a]Cl.

**Fig. S22** FT-IR spectrum of [HL1]Cl.

**Fig. S23** FT-IR spectrum of [HL2]Cl.

**Fig. S24** FT-IR spectrum of [HL3]Cl.


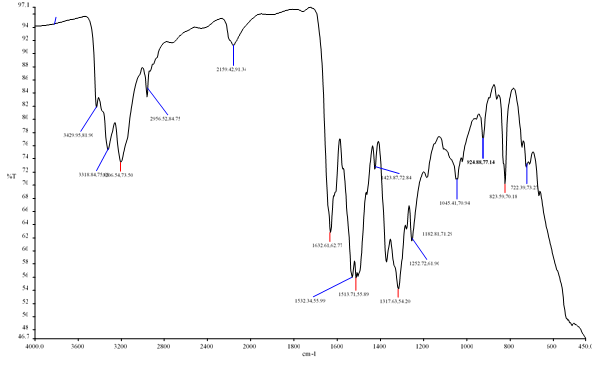


**Fig. S25** FT-IR spectrum of [HL4]Cl.

**Fig. S26** FT-IR spectrum of [HL5]Cl.


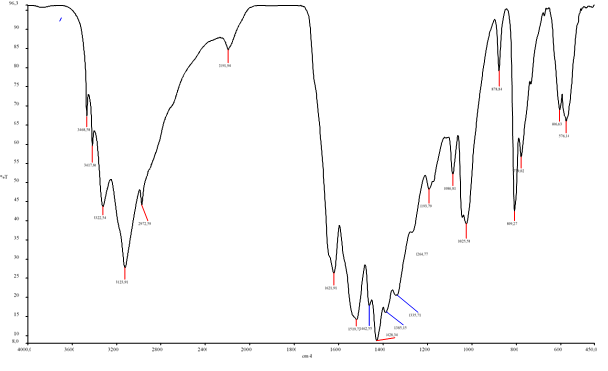


**Fig. S27** FT-IR spectrum of [H2L6]Cl2.

**Fig. S28** FT-IR spectrum of [H2L7]Cl2.

**Fig. S29** FT-IR spectrum of [HL1a]Cl.

**Fig. S30** FT-IR spectrum of [HL2a]Cl

**Fig. S31** FT-IR spectrum of [HL3a]Cl.

**Fig. S32** FT-IR spectrum of [HL4a]Cl.


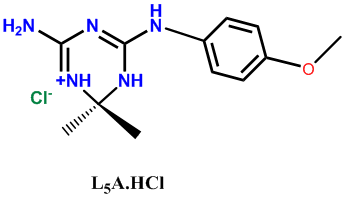


**Fig. S33** FT-IR spectrum of [HL5a]Cl

**Fig. S34** π-electron delocalization in biguanidine derivatives and their 1,3,5-triazine derivatives.


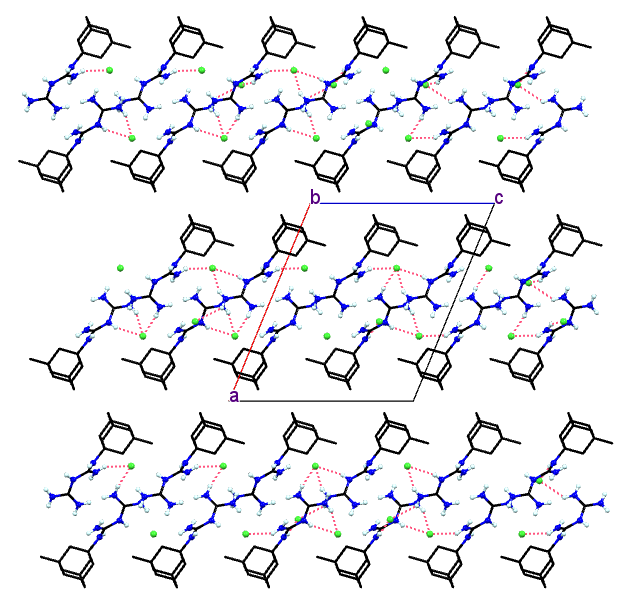


**Fig. S35** The NH∙∙∙∙Cl hydrogen bond network in [H2L7]Cl2.


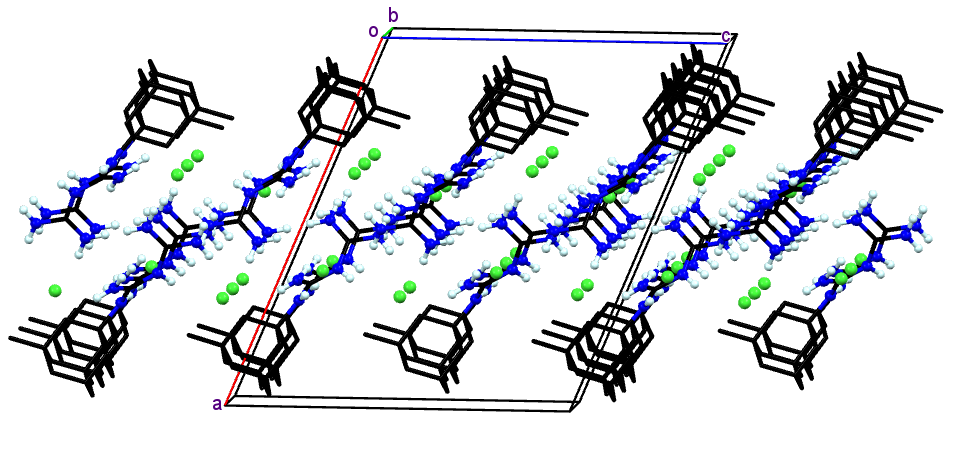


**Fig. S36** Packing diagram of [H2L7]Cl2.


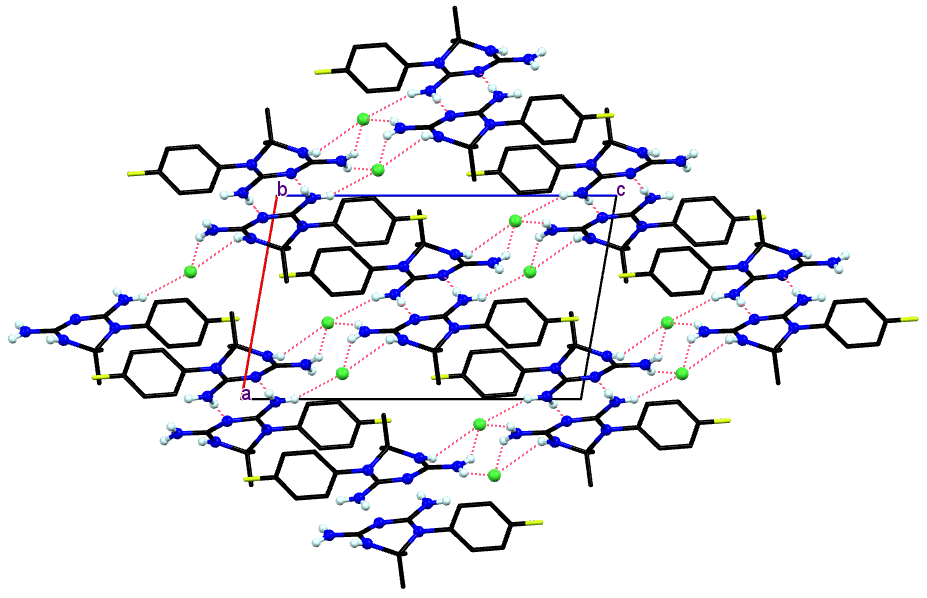


**Fig. S37** Packing diagram of [HL1a]Cl showing the NH∙∙∙∙Cl hydrogen bond network.
